# Supplementary material for: Ternary polyaniline–graphene–TiO2hybrid with enhanced activity for visible-light photo-electrocatalytic water oxidation
Source: Royal Society of Chemistry journal article supplement (doi:10.1039/c3ta13751a), 2013-10-31
Supplement: c3ta13751a.pdf [file c3ta13751a.pdf]

## Supporting Online Material for

# Ternary Polyaniline-Graphene-TiO<sub>2</sub> Hybrid with Enhanced Activity for Visible-Light Photoelectrocatalytic Water Oxidation

Lin Jing, Zhi-Yu Yang, Yu-Fei Zhao, Yu-Xia Zhang, Xin Guo, Yi-Ming Yan\*, and Ke-Ning Sun\* (\*To whom correspondence should be addressed. E-mail: yanym@bit.edu.cn; bitkeningsun@163.com)

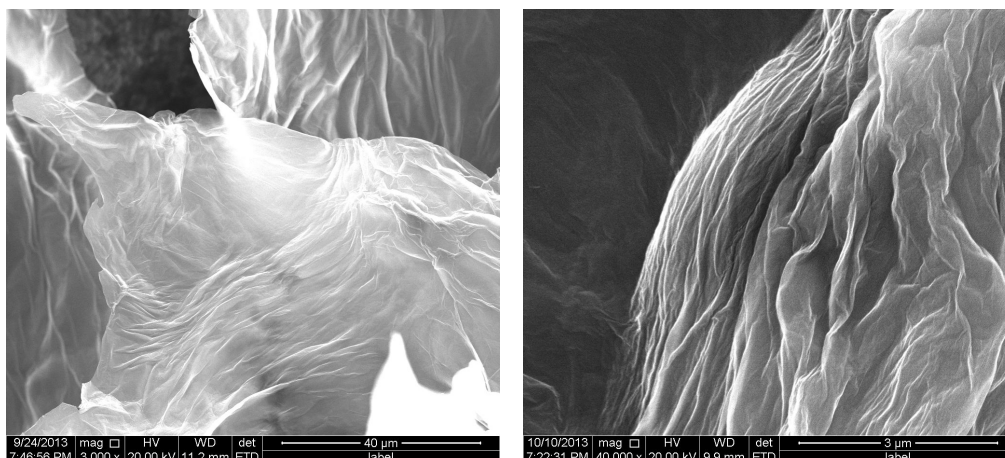

Fig. S1 SEM images of graphene nanosheets.

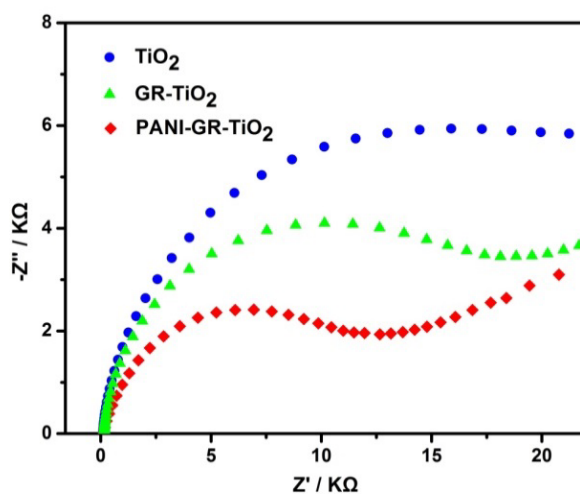

Fig. S2 EIS spectra of the TiO<sub>2</sub>, binary GR-TiO<sub>2</sub>, ternary PANI-GR-TiO<sub>2</sub> electrodes.
